# Supplementary material for: Co-creation Approach in Practice: Naming a Cafe Located within a Rural Health Service Provides Added Value to a Health Strategy
Source: Hindawi journal article supplement (doi:10.1155/2023/9989552), 2023-03-20
Supplement: f1 [file 9989552.f1.pdf]

Carmen Vargas, Carolina Venegas Hargous, Janine Harfield, Colin Bell, Jillian Whelan. Co-creation approach in practice: naming a café located within a rural health service provides added value to a health strategy.

**Table S1: Survey fragment**

| Presented item                                                                                                                                                                                                                                                                                                                                                                                                                                                                                            | Item design                                                            |
|-----------------------------------------------------------------------------------------------------------------------------------------------------------------------------------------------------------------------------------------------------------------------------------------------------------------------------------------------------------------------------------------------------------------------------------------------------------------------------------------------------------|------------------------------------------------------------------------|
| What is your gender? <ul style="list-style-type: none"> <li>• Male</li> <li>• Female</li> <li>• Non-binary / third gender</li> <li>• Prefer not to say</li> </ul>                                                                                                                                                                                                                                                                                                                                         | One option to be selected                                              |
| What is your age group? <ul style="list-style-type: none"> <li>• 18-20 years</li> <li>• 21-30 years</li> <li>• 31-44 years</li> <li>• 45-60 years</li> <li>• 61+ years</li> </ul>                                                                                                                                                                                                                                                                                                                         | One option to be selected                                              |
| Which one of the following options best describes your link to this organisation? <ul style="list-style-type: none"> <li>• Nursing</li> <li>• Administration and Clerical</li> <li>• Medical support</li> <li>• Environmental Services</li> <li>• Medical Officers</li> <li>• Sessional Clinicians</li> <li>• Allied health</li> <li>• Support Service/Ancillary</li> <li>• Food service staff (i.e., food service, kitchen, and food retail staff)</li> <li>• Linen Services</li> <li>• Other</li> </ul> | One option to be selected                                              |
| 1. Were you aware of the café naming competition that took place in May 2022? <ul style="list-style-type: none"> <li>• Yes</li> <li>• No</li> </ul>                                                                                                                                                                                                                                                                                                                                                       | One option to be selected                                              |
| 2. Did you participate in the café naming competition? <ul style="list-style-type: none"> <li>• Yes</li> <li>• No</li> </ul>                                                                                                                                                                                                                                                                                                                                                                              | One option to be selected<br><b>If answer is no skip to question 4</b> |
| 3. In which phase of the café naming competition did you participate? <ul style="list-style-type: none"> <li>• Submitting a name for the café</li> <li>• Voting for a name</li> <li>• Both</li> </ul>                                                                                                                                                                                                                                                                                                     | One option to be selected                                              |

4. The Café located at the Horsham Hospital has a new name! Which of the following options is your favourite logo for the "HEARTBEET Café"? (Please tick one)

CONCEPT 1

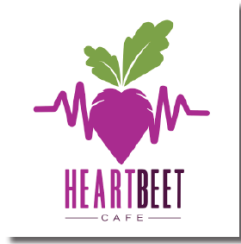

CONCEPT 2

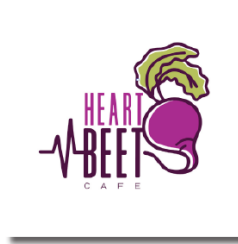

CONCEPT 3

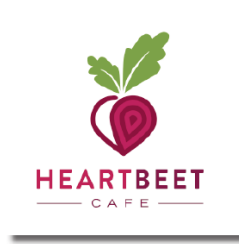

- Concept 1
- Concept 2
- Concept 3

One option to be selected

**Table S2: Interview guide**

| <b>Opening/Rapport</b>           |                                                                                                                                                                           |                                                                                                                  |                                                                                                                                                                                                                                                                                                                     |
|----------------------------------|---------------------------------------------------------------------------------------------------------------------------------------------------------------------------|------------------------------------------------------------------------------------------------------------------|---------------------------------------------------------------------------------------------------------------------------------------------------------------------------------------------------------------------------------------------------------------------------------------------------------------------|
| <b>Topic</b>                     |                                                                                                                                                                           | <b>Rationale</b>                                                                                                 |                                                                                                                                                                                                                                                                                                                     |
| Introduction                     |                                                                                                                                                                           | Name, study background                                                                                           |                                                                                                                                                                                                                                                                                                                     |
| Plain language explanation       |                                                                                                                                                                           | Objective of the study and aim of the interview                                                                  |                                                                                                                                                                                                                                                                                                                     |
| Record consent for participation |                                                                                                                                                                           | Consent from the participant to be recorded and reiteration of the use of information in a non-identifiable form |                                                                                                                                                                                                                                                                                                                     |
| Participant introduction         |                                                                                                                                                                           | Name, position within the organization, type of job activities                                                   |                                                                                                                                                                                                                                                                                                                     |
| <b>Main interview</b>            |                                                                                                                                                                           |                                                                                                                  |                                                                                                                                                                                                                                                                                                                     |
| <b>Topic</b>                     | <b>Theoretical outline</b>                                                                                                                                                | <b>Participant</b>                                                                                               | <b>Type of questions</b>                                                                                                                                                                                                                                                                                            |
| Motivations                      | Motivation is described as a force that directs individuals toward goals. It reflects readiness and interest to engage in the activity.                                   | Competition participant                                                                                          | How often do you get involved in the hospital activities? <ul style="list-style-type: none"> <li>• Why?</li> <li>• Is it different before and after COVID?</li> </ul> What was your first reaction when the competition opened?                                                                                     |
|                                  |                                                                                                                                                                           | Planning committee                                                                                               | What did you expect from this naming competition?<br>What was your experience through it?                                                                                                                                                                                                                           |
| Opportunity                      | Opportunity represents the enablers to perform an activity. Time opportunity is the availability of time to devote to co-creation activities on the side of the consumer. | Competition participant                                                                                          | What is your opinion about the competition process? <ul style="list-style-type: none"> <li>• Easy/accessible</li> <li>• Open/transparent</li> <li>• Communication</li> <li>• Supportive</li> </ul> Did you expect this level of participation/competition? <ul style="list-style-type: none"> <li>• Why?</li> </ul> |
|                                  |                                                                                                                                                                           | Planning committee                                                                                               | What considerations did you take for the competition to be <ul style="list-style-type: none"> <li>• Easy/accessible</li> <li>• Open/transparent</li> <li>• Communication</li> </ul>                                                                                                                                 |

|                           |                                                                                                                                           |                                                                      |                                                                                                                                                                                                             |
|---------------------------|-------------------------------------------------------------------------------------------------------------------------------------------|----------------------------------------------------------------------|-------------------------------------------------------------------------------------------------------------------------------------------------------------------------------------------------------------|
|                           |                                                                                                                                           |                                                                      | <ul style="list-style-type: none"> <li>Supportive</li> </ul> Did you expect this level of participation/competition? <ul style="list-style-type: none"> <li>Why?</li> </ul>                                 |
| Ability                   | Ability represents the extent to which individuals have the necessary resources, such as knowledge and skills, to achieve a desired goal. | Competition participant                                              | You came up with a great name:<br>How your type of work helped you to come up with the name?<br>Do you engage in other creative tasks?<br>Have you had previous training on communication strategies/media? |
|                           |                                                                                                                                           | Planning committee                                                   | What are your opinions about the type of names that came in?<br>Were you able to identify the department where the name came from? <ul style="list-style-type: none"> <li>Why?</li> </ul>                   |
| <b>Closing</b>            |                                                                                                                                           |                                                                      |                                                                                                                                                                                                             |
| <b>Topic</b>              |                                                                                                                                           | <b>Rationale</b>                                                     |                                                                                                                                                                                                             |
| Summary of the interview  |                                                                                                                                           | Summary of main points and final question to add missing information |                                                                                                                                                                                                             |
| Commitment for transcript |                                                                                                                                           | Verbal commitment and timeframe for returning the notes              |                                                                                                                                                                                                             |

**Table S3: Codebook**

| Major Code     | Description                                                                                                 | Minor Code  | Description                                                   |
|----------------|-------------------------------------------------------------------------------------------------------------|-------------|---------------------------------------------------------------|
| 1. Motivations | Force that directs individuals towards goals. It reflects readiness and interest to engage in the activity. | Initiate    | Motivation to start the project                               |
|                |                                                                                                             | Participate | Motivation to get involved in certain capacity in the project |

|                |                                                                          |                   |                                                                                                                                                                                                                                                                                                     |
|----------------|--------------------------------------------------------------------------|-------------------|-----------------------------------------------------------------------------------------------------------------------------------------------------------------------------------------------------------------------------------------------------------------------------------------------------|
| 2. Opportunity | Occurring actions between two or more stakeholders.                      | Access            | Ability represents the extent to which individuals have the necessary resources, such as knowledge and skills, to achieve a desired goal. Facilitates the access to processes and resources that are used to create and deliver their product or service offerings (participate in the competition) |
|                |                                                                          | Dialogue          | Two-way communication to enable shared understanding and meaning                                                                                                                                                                                                                                    |
|                |                                                                          | Transparency      | Clear and open process and information exchange (stakeholders were fully informed of what happened at each stage of the competition)                                                                                                                                                                |
| 3. Benefits    | Elements that help participants to get advantages as the result of them. | Interactions      | High level of collaboration between relevant stakeholders in the process                                                                                                                                                                                                                            |
|                |                                                                          | Participation     | Engagement in the naming competition without being actively involved in the decision-making process.                                                                                                                                                                                                |
|                |                                                                          | Value co-creation | Creation of unique personalised experiences – ownership and engagement in subsequent action                                                                                                                                                                                                         |

**Table S3: Codebook**

| <b>Major Code</b> | <b>Description</b>                                                                                          | <b>Minor Code</b> | <b>Description</b>                                                                                                                                                                                                                                                                                                 |
|-------------------|-------------------------------------------------------------------------------------------------------------|-------------------|--------------------------------------------------------------------------------------------------------------------------------------------------------------------------------------------------------------------------------------------------------------------------------------------------------------------|
| 1. Motivations    | Force that directs individuals towards goals. It reflects readiness and interest to engage in the activity. | Initiate          | Motivation to start the project                                                                                                                                                                                                                                                                                    |
|                   |                                                                                                             | Participate       | Motivation to get involved in certain capacity in the project                                                                                                                                                                                                                                                      |
| 2. Opportunity    | Occurring actions between two or more stakeholders.                                                         | Access            | Ability represents the extent to which individuals have the necessary resources, such as knowledge and skills, to achieve a desired goal. Facilitates the access to processes and resources that are used to create and deliver their product or service offerings (participate in the competition)                |
|                   |                                                                                                             | Dialogue          | Dialogue: dialogue, supplants the traditional unidirectional flow of information from the provider to the consumer, to the creation of shared meaning that "require[s] deep engagement, lively interactivity, empathetic understanding, and a willingness by both parties to act, especially when they're at odds" |
|                   |                                                                                                             | Transparency      | Clear and open process and information exchange                                                                                                                                                                                                                                                                    |
| 3. Benefits       | Elements that help participants to get advantages as the result of them.                                    | Interactions      | Collaborative cooperation in the process.                                                                                                                                                                                                                                                                          |
|                   |                                                                                                             | Participation     | Engagement in the naming competition without being actively involved in the decision-making process.                                                                                                                                                                                                               |
|                   |                                                                                                             | Value co-creation | Creation of unique personalised experiences – ownership and engagement in subsequent action                                                                                                                                                                                                                        |
